# Supplementary material for: Modeling Pesticide Effects on Multiple Threatened and Endangered Cyprinid Fish Species: The Role of Life-History Traits and Ecology
Source: MDPI journal article supplement (doi:10.3390/ecologies3020015), 2022-06-06
Supplement: s1 [file s1]

Archive with 6 entries (6 files):
- Pop-GUIDE Tables-Dionda diaboli.xlsx
- Pop-GUIDE Tables-Gila cypha.xlsx
- Pop-GUIDE Tables-Meda fulgida.xlsx
- Pop-GUIDE Tables-Topeka shiner.xlsx
- SI-Population dynamics and Exposure profiles.pdf
- TRACE_Accolla-et-al-2022.pdf
