# Supplementary material for: Modeling Pesticide Effects on Multiple Threatened and Endangered Cyprinid Fish Species: The Role of Life-History Traits and Ecology
Source: MDPI journal article supplement (doi:10.3390/ecologies3020015), 2022-06-06
Supplement: s1 [file s1 › Pop-GUIDE Tables-Dionda diaboli.xlsx]

## Sheet: Table S1
Table S1. Life-history characteristics that should be targeted to inform a population model for ERA. Examples of the types of information that could be considered to provide general, realistic, or precise information are described in each column. NA = Not available or applicable.
Characteristic	General	Realistic	Precise	REF	NOTES
Life span	1 to 2 years (3 in captivity pers comm)			Final recovery plan 2005	based on closely related minnows
Reproductive/breeding season	[1]January to August [2] winter through summer, January-June or February-July (6 months) --[3] June and Sepember			Final recovery plan 2005 -- [2] McMillian thesis 2011 -- [3]Phillips et al 2011	based on closely related minnows--Dionda diaboli spawns at T 18-22 C in captivity, 16-27 in the wild (McMIllan thesis)
Reproductive frequency	multiple clutches during the season			McMillian thesis 2011
Reproductive output/clutch size			mean clutch size: [1] 147; [2] 137 in captivity	[1] McMillian thesis 2011; [2] Gibson and Fries 2005	continual development of oocytes in the ovaries, spawning frequency often constrained by food availability --> extremely difficult to estimate total annual fecundity. AmP has a very different estimates (100 eggs per year)
Onset of maturation	[1] Juveniles are <30 mm TL; [2] maturity around 25 mm SL			[1] Final Performance Report_Texas_2014. [2] Gibson and Fries 2005
Hatching (eggs)/germination (seeds) rate	0.015			Echo-Hawk thesis 2015	not very reliable
Immature transition rate (including metamorphosis)1					NA
Sex ratio	1 1			McMillian thesis 2011
Recruitment rate					NA
Survival rate					NA
Growth rate2		between 0.092 to 0.216 mm/d (age 0)		McMillian thesis 2011
Seedling emergence; emergence after hibernation; emergence of new generation					NA
Dormancy duration (inactive life stages, e.g., hibernation, soil seed bank)					NA
1 Includes discrete “growth” rates for transition of immature life stages depicted in stage-based models (Caswell 2001)
2 Includes continuous growth rate for used for size-based functions

## Sheet: Table S2
Table S2. Population and spatial characteristics that should be targeted to inform a population model for ERA. Examples of the types of information that could be considered to provide general, realistic, or precise estimates are described in each column. NA = Not available or applicable.
Characteristic	General	Realistic	Precise	REF	NOTES
Density dependence	growth rate and survival affected by density	It eats its own eggs		Gibson and Fries 2005 --Phillips et al 2011
Population size	0.171 + 0.01 fish/m2			Final Performance Report_Texas_2014	in pools - about 900 m^2 but drought (0.09 ha)
Spatial Metapopulation structure					NA
Movement					NA
Habitat features		associate with water willow and other macrophytes over gravel-cobble substrate; fast-flowing. Water T from 24 to 30 C		Garrett et al 2004
Geographical range	Devils River, San Felipe Creek, Sycamore Creek, and Las Moras Creek in Texas (Rio Grande Basin)			Garrett_et_al_2005
Habitat classification/suitability	[1] stream - where springflow enters stream		[2] spawn at T fr0m 18 to 22 in lab, probably 16-27 in the wild	[1] Final recovery plan 2005, [2] Macmillan thesis 2011

## Sheet: Table S3
Table S3. External factors that should be targeted to inform a population model for ERA. Examples of the types of information that could be considered to provide general, realistic, or precise estimates are described in each column. NA = Not available or applicable.
Characteristic	General	Realistic	Precise	REF	NOTES
Predation/herbivory	[1] Possible prey of introduced species such as smallmouth bass, catfishes (eggs) and blue tilapia (eggs). [2] Diet: algae and detritus			[1] Final recovery plan 2005, [2] Macmillan thesis 2011	detailed diet in McMillan thesis
Competition	competition with introduced species			Echo-Hawk thesis 2015
Environmental conditions					NA
Stressors - pathogens					NA
Stressors – abiotic, other		decrease of water quality and quantity mostly due to irrigation		Garrett et al 2004
Existing management		Species recovery plan (2005!)
Indirect effects (obligatory relationships)					NA

## Sheet: Table S4
Table S4. Exposure and effects characteristics that should be targeted to inform a population model for ERA. Examples of the types of information that could be considered to provide general, realistic, or precise estimates are described in each column. NA = Not available or applicable.
inderect effects - data on diet items	direct effects - data on fish when exposed to chlorothalonil
Characteristic	General	Realistic	Precise
Chemical exposure	Estimated EEC1	Modeled fate and daily EECs based on environmental conditions	Modeled (SEAWAVE-QEX ) and measured (WQP) concurrence of spatial and/or temporal pattern of exposure of hydroxychlorothalonil (this study)
Temporal exposure pattern	NA	Representative values of seasonal effects	High resolution (daily) modeling of chemical concentration (this study). Effects measured in lab study on fathead minnow (Schults, 1980)
Exposure pattern within and across habitat	NA	Estimate of proportion of population impacted by exposure based on spatial overlap. Estimated or hypothesized concentration distribution	Spatial distribution of chemical concentration/ gradient
Representation of toxic effects	Threshold of effect	Hhypothesized dose-response function based on SSD on invertebrates	Estimation of effect via TKTD models
Effects by life stage or size	Simulated impact based on assumptions or general trends (i.e., Adverse Outcome Pathways)	Effect based on observations in representative species	Measured effects in focal species included in parameter estimates
Effects depending on exposure route (e.g. dietary, chemical in water)	NA	Modeled or simulated internal dose value, effects based on categorical data (e.g., diet, exposure route)	Effects linked to body burden measurements
1 Expected Exposure Concentration
