# Supplementary material for: Modeling Pesticide Effects on Multiple Threatened and Endangered Cyprinid Fish Species: The Role of Life-History Traits and Ecology
Source: MDPI journal article supplement (doi:10.3390/ecologies3020015), 2022-06-06
Supplement: s1 [file s1 › Pop-GUIDE Tables-Gila cypha.xlsx]

## Sheet: Table S1
Table S1. Life-history characteristics that should be targeted to inform a population model for ERA. Examples of the types of information that could be considered to provide general, realistic, or precise information are described in each column. NA = Not available or applicable.
Characteristic	General	Realistic	Precise	REF	NOTES
Life span	up to 30 years			Yackulic 2014, https://www.coloradoriverrecovery.org/general-information/the-fish/humpback-chub.html	Amp says 5 years
Reproductive/breeding season	March -July, when T are between 14 - 24 degrees Celsius, but reported to be mostly April May. In LCR, spawning commenced in late-March, peaked in mid-April, and waned in mid-May [2]			[1] FWS website (https://www.fws.gov/fisheries/freshwater-fish-of-america/humpback_chub.html). [2]Gorman_Stone 1999
Reproductive frequency	Until supply of eggs and sperm is exahausted			Gorman-Stone 1999; Yackulic et al 2014	Unclear how many times they spawn during the spawning season. Spawning cycle is repeated until the supply of eggs and sperm in exhausted, usually by mid-May
Reproductive output/clutch size	[1] 5445 per year	[2] Relationship (Roundtail chub) fecundity-total weight: FE=25.3 TW+328 (difference of about 3 inches in max L)		[1] Hamman 1982 (AmP) ; [2] Brouder et al 2006	maximum total output. Spawning at 19-22 C. In this experiment, 79/84% hatch, 99/95% swim-up (but see T dependence) -- Check egg-length relation ship with Hamman 1982
Onset of maturation	[1] 2-3 years old,	[2] 40–200 mm TL		[1] Amp, [2] Yackulic et al 2014	unclear division on adults and subadults. DEB code consider DEB-juveniles up to 2 yo. Yackulic et al site: Colorado rRiver + Little Colorado River
Hatching (eggs)/germination (seeds) rate	about 0.7 in lab conditions (depende on T)			Hamman 1982
Immature transition rate (including metamorphosis)1	about 0.85 in lab conditions (depende on T)			Hamman 1983	number of fry
Sex ratio	assumed 1:1			https://www.coloradoriverrecovery.org/documents-publications/work-plan-documents/arpts/2001/rsch/22a3.pdf
Recruitment rate	1500-2500 (age 1 recruitment in LCR)			Pine et al 2013
Survival rate	0.4 for age 1 0.65 age 2 0.86 age 3 and older (Pine et al, citation of Van Haverbeke et al 2011)	[1] 11% -- max about 0.6 for subadults (1 to 2 yo)		[1] Yackulic 2014 --Pine et al 2013 (model)	chance of reaching 200 mm (small adults) - 5% to reach 250 mm
Growth rate2		about 0.03 up to 0.15 (check figure 4)		Yackulic 2015	age 1 100-140 mm TL (Dzul et al 2014)
Seedling emergence; emergence after hibernation; emergence of new generation					NA
Dormancy duration (inactive life stages, e.g., hibernation, soil seed bank)					NA
1 Includes discrete “growth” rates for transition of immature life stages depicted in stage-based models (Caswell 2001)
2 Includes continuous growth rate for used for size-based functions

## Sheet: Table S2
Table S2. Population and spatial characteristics that should be targeted to inform a population model for ERA. Examples of the types of information that could be considered to provide general, realistic, or precise estimates are described in each column. NA = Not available or applicable.
Characteristic	General	Realistic	Precise	REF	NOTES
Density dependence		juvenile mortality is strongly dd (assumed dd decreases with size, no data)		Pine et al 2013
Population size		[1] estimates up to 4,400 adults (4+) using models based on capture-recapture in LCR. [2] 5000-11000 adults in LCR--[1] about 3400 in 14.2 km or 4400 in about 35 km (C		[1] Coggings et al 2006, [2] Spurgeon et al 2015	average width LCR: 33.5 m (USGS sheet). About 0.02--> 0.007 adults (4+)/m2
Spatial Metapopulation structure					NA
Movement		young fish remains in LCR, as they approach 300 mm TL they shift fall and winter residency to the CR mainstream and migrate to LCR in spring to spawn, an return to the CR late summer. Migration can reach 13 - 18 km upstream in LCR during spawning season		Gorman Stone 1999
Habitat features			Non-spawning fish use areas of slower current, finer substrate, closer to the bottom and less structural complexity. Spawning use areas close to emergent edges, gravel, greater complexity	Gorman Stone 1999
Geographical range	Colorado River Basin, Green River basin	swift, deep, turbid		https://www.coloradoriverrecovery.org/general-information/the-fish/humpback-chub.html	Groman Stone 1999
Habitat classification/suitability	Streams		Greatest hatching success for humpback chub eggs occurs at 20 degrees Celsius	https://www.fws.gov/fisheries/freshwater-fish-of-america/humpback_chub.html

## Sheet: Table S3
Table S3. External factors that should be targeted to inform a population model for ERA. Examples of the types of information that could be considered to provide general, realistic, or precise estimates are described in each column. NA = Not available or applicable.
Characteristic	General	Realistic	Precise	REF	NOTES
Predation/herbivory	[1] Nonnative species seem to predate (brown and rainbow trouts, channel catfish, black bullhead). [2] Diet: aquatic and terrestril invertebrate, generalist opportunistic feeder			[1] Spurgeon et al 2015 -- [2] Meretsky et al 2000 -- Petersen Paukert_2005 -- FWS recovery goals 2002
Competition	competition with nonnative trout possilbe			Petersen Paukert_2005
Environmental conditions		cooler water temperatures can cause a decline		Yackulic et al 2014
Stressors - pathogens					NA
Stressors – abiotic, other		dams construction		Yackulic et al 2014
Existing management		water management to provide adequate in-stream flows within their existing range, the construction of ﬁsh passages and screens, the monitoring of ﬁsh population numbers and the managing of non‐native ﬁshes and invasive species.		https://www.fws.gov/fisheries/freshwater-fish-of-america/humpback_chub.html
Indirect effects (obligatory relationships)					NA

## Sheet: Table S4
Table S4. Exposure and effects characteristics that should be targeted to inform a population model for ERA. Examples of the types of information that could be considered to provide general, realistic, or precise estimates are described in each column. NA = Not available or applicable.
inderect effects - data on diet items	direct effects - data on fish when exposed to chlorothalonil
Characteristic	General	Realistic	Precise
Chemical exposure	Estimated EEC1	Modeled fate and daily EECs based on environmental conditions	Modeled (SEAWAVE-QEX ) and measured (WQP) concurrence of spatial and/or temporal pattern of exposure of hydroxychlorothalonil (this study)
Temporal exposure pattern	NA	Representative values of seasonal effects	High resolution (daily) modeling of chemical concentration (this study). Effects measured in lab study on fathead minnow (Schults, 1980)
Exposure pattern within and across habitat	NA	Estimate of proportion of population impacted by exposure based on spatial overlap. Estimated or hypothesized concentration distribution	Spatial distribution of chemical concentration/ gradient
Representation of toxic effects	Threshold of effect	Hhypothesized dose-response function based on SSD on invertebrates	Estimation of effect via TKTD models
Effects by life stage or size	Simulated impact based on assumptions or general trends (i.e., Adverse Outcome Pathways)	Effect based on observations in representative species	Measured effects in focal species included in parameter estimates
Effects depending on exposure route (e.g. dietary, chemical in water)	NA	Modeled or simulated internal dose value, effects based on categorical data (e.g., diet, exposure route)	Effects linked to body burden measurements
1 Expected Exposure Concentration
