# Supplementary material for: Modeling Pesticide Effects on Multiple Threatened and Endangered Cyprinid Fish Species: The Role of Life-History Traits and Ecology
Source: MDPI journal article supplement (doi:10.3390/ecologies3020015), 2022-06-06
Supplement: s1 [file s1 › Pop-GUIDE Tables-Meda fulgida.xlsx]

## Sheet: Table S1
Table S1. Life-history characteristics that should be targeted to inform a population model for ERA. Examples of the types of information that could be considered to provide general, realistic, or precise information are described in each column. NA = Not available or applicable.
Characteristic	General	Realistic	Precise	REF	NOTES
Life span	3 years, maximum 4			Marsh_Recovery plan 1988
Reproductive/breeding season	[1]April-June; [2] April-May			[1] Marsh_Recovery plan 1988 (http://www.nativefishlab.net/library/textpdf/19419.pdf) -- [2] Gori et al 2014	T reaches 19 °C - Nature Serve Explorer; it seems higher than 18 C from Barber et al 1970 --
Reproductive frequency	maybe fractional spawners during the reproductive period			AmP, Recovery plan 1988	two possible spawnings in larger individuals -- Barber et al 1970 --- maybe not so relevant because in some pop age II individuals are a few -- Prospst et al 1986
Reproductive output/clutch size	[1] 90-250 ova (length/age dependent) - [2] other source up to almost 900. Amp: 1749 per year (max #, including mature and immature ova)			[1] Recovery plan 1988 -- [2] Prospst et al Report - 1986
Onset of maturation	puberty (sensu DEB) starts probably around 5-6 months (ovarian development). First reproduction is at 1 yo			Prospst et al Report - 1986
Hatching (eggs)/germination (seeds) rate	5 days for emergence, 5-6 mm TL (usually mid-late April)			Gori et al 2014	8.6%-21.8% of dace Leuciscus leuciscus eggs (chalkstream in England) (Mills 1981)
Immature transition rate (including metamorphosis)1	about 2 months to reach juvenile stage (30 mm SL- 35-50 mm TL; larvae: 10-30 mm TL) by late June. Juveniles grow up to 35 mm SL in mid July. Age-0 ind. reach 45 mm SL (November) and then almost stop growing during winter (adult start at about 50 mm TL)			Gori et al 2014	NA
Sex ratio	not constant but can be considered 1:1			Recovery plan 1988
Recruitment rate					NA
Survival rate	high mortality spawning adults, winter mortality			Prospst et al Report - 1986
Growth rate2	[1] about 8 mm/month at the beginning (up to 40 mm long), then 1-2 mm/ month up to max size 65-68 mm --[2]: 1 mm/day for first 15 days. [3] Max TL 75 mm			[1] Recovery plan 1988-- [2] Prospst et al Report - 1986 -- [3] Gori et al 2014	other info Marsh 1996, Barber et al 1970 (validation)
Seedling emergence; emergence after hibernation; emergence of new generation					NA
Dormancy duration (inactive life stages, e.g., hibernation, soil seed bank)					NA
1 Includes discrete “growth” rates for transition of immature life stages depicted in stage-based models (Caswell 2001)
2 Includes continuous growth rate for used for size-based functions

## Sheet: Table S2
Table S2. Population and spatial characteristics that should be targeted to inform a population model for ERA. Examples of the types of information that could be considered to provide general, realistic, or precise estimates are described in each column. NA = Not available or applicable.
Characteristic	General	Realistic	Precise	REF	NOTES
Density dependence					experiment on Leuciscus leuciscus (England) shows DD fry survival rates: 46% vs 0.15% when initial D 164-fold different (Mills 1981)
Population size	2.36/ m^2-- 0.185 #m^2			Pine et al 2017	mean density in Gila River, from Whitney2014; Gila River, Gori et al 2014 (average 1999-2012)
Spatial Metapopulation structure	NA				NA
Movement					NA -- I found no migration, against what reported in AmP
Habitat features		sandy and rocky runs and pools and often occurs near riffles of creeks and small rivers. large perennial streams, moderate to fast velocity waters. Specific habitat consists of shear zones where rapid flow borders slower flow, eddies at downstream riffle edges. Typically streams are found under 6,000 feet in elevation.		Spikedace redbook 2012
Geographical range	Gila River system in Arizona and New Mexico			fishbase
Habitat classification/suitability	Streams

## Sheet: Table S3
Table S3. External factors that should be targeted to inform a population model for ERA. Examples of the types of information that could be considered to provide general, realistic, or precise estimates are described in each column. NA = Not available or applicable.
Characteristic	General	Realistic	Precise	REF	NOTES
Predation/herbivory	[1] Carnivores that feed on aquatic and terrestrial insects, rarely fish larvae. Smaller ind have higher food diversity. predators are nonnative species (maybe).			[1] Recovery plan 1988
Competition	[3] speckled dace	[2] nonnative species (e.g suspected compet for space with red shiner)		Spikedace redbook 2012, [2] Rinne 1991; [3] Prospst et al 1986
Environmental conditions					NA
Stressors - pathogens					NA
Stressors – abiotic, other		damming, habitat alteration or destruction		Spikedace redbook 2012
Existing management		recovery plan 1991 (2015?) Gila River Basin Native Fishes Conservation Program		https://www.usbr.gov/lc/phoenix/biology/azfish/projects.html
Indirect effects (obligatory relationships)					NA

## Sheet: Table S4
Table S4. Exposure and effects characteristics that should be targeted to inform a population model for ERA. Examples of the types of information that could be considered to provide general, realistic, or precise estimates are described in each column. NA = Not available or applicable.
inderect effects - data on diet items	direct effects - data on fish when exposed to chlorothalonil
Characteristic	General	Realistic	Precise
Chemical exposure	Estimated EEC1	Modeled fate and daily EECs based on environmental conditions	Modeled (SEAWAVE-QEX ) and measured (WQP) concurrence of spatial and/or temporal pattern of exposure of hydroxychlorothalonil (this study)
Temporal exposure pattern	NA	Representative values of seasonal effects	High resolution (daily) modeling of chemical concentration (this study). Effects measured in lab study on fathead minnow (Schults, 1980)
Exposure pattern within and across habitat	NA	Estimate of proportion of population impacted by exposure based on spatial overlap. Estimated or hypothesized concentration distribution	Spatial distribution of chemical concentration/ gradient
Representation of toxic effects	Threshold of effect	Hhypothesized dose-response function based on SSD on invertebrates	Estimation of effect via TKTD models
Effects by life stage or size	Simulated impact based on assumptions or general trends (i.e., Adverse Outcome Pathways)	Effect based on observations in representative species	Measured effects in focal species included in parameter estimates
Effects depending on exposure route (e.g. dietary, chemical in water)	NA	Modeled or simulated internal dose value, effects based on categorical data (e.g., diet, exposure route)	Effects linked to body burden measurements
1 Expected Exposure Concentration
