# Supplementary material for: Modeling Pesticide Effects on Multiple Threatened and Endangered Cyprinid Fish Species: The Role of Life-History Traits and Ecology
Source: MDPI journal article supplement (doi:10.3390/ecologies3020015), 2022-06-06
Supplement: s1 [file s1 › Pop-GUIDE Tables-Topeka shiner.xlsx]

## Sheet: Table S1
Table S1. Life-history characteristics that should be targeted to inform a population model for ERA. Examples of the types of information that could be considered to provide general, realistic, or precise information are described in each column. NA = Not available or applicable.
Characteristic	General	Realistic	Precise	REF	NOTES
Life span	Up to 3 years			Kerns and Bonneau, 2002
Reproductive/breeding season	[1] 15 May – 6 Aug (peak: 16 Jul) [2] 23 May - 31 Jul (peak: 11 Jun)			[1] (Dahle, 2001) [2] (Kerns and Bonneau, 2002) – Commence spawning if T raised to 24.4 C (Dahle 2001)
Reproductive frequency		Once a year; see [3], App. B, section 2.1.3. for summary of proportions of individuals spawning by age		[1] (Dahle, 2001) [2] (Kerns and Bonneau, 2002) [3] (Schmolke et al., 2019)
Reproductive output/clutch size		Clutch size (number of mature ova) relative to [1] SL, and [2] body weight reported; see also [3], App. B, section 2.1.3.		[1] (Dahle, 2001) [2] (Kerns and Bonneau, 2002) [3] (Schmolke et al., 2019)
Onset of maturation	[1] Minimum SL at maturity: 30 mm SL (females), 36 mm SL (males)	[1] 52% spawn at 1 yr old, 93% at 2 yr old, all 3 yr old TS spawn [2] 62% spawn at 1 yr old, all 2 and 3 yr old TS spawn see also [3], App. B, section 2.1.3		[1] (Dahle, 2001) [2] (Kerns and Bonneau, 2002) [3] (Schmolke et al., 2019)
Hatching (eggs)/germination (seeds) rate				NA
Immature transition rate (including metamorphosis)1				NA
Sex ratio	Assumed even (0.5 male)	Sex ratio ~0.5 female in early life stages; shifts to ~0.67 female by age 3 See also [3], App. B, section 2.1.2.		[1] (Dahle, 2001) [2] (Kerns and Bonneau, 2002) [3] (Schmolke et al., 2019)
Recruitment rate				NA
Survival rate	[1] [2] Demographic data from 2-yr study available See also [3], App. B, section 2.2. for estimation of survival rates from these data			[1] (Dahle, 2001) [2] (Kerns and Bonneau, 2002) [3] (Schmolke et al., 2019)
Growth rate2		[1] [2] Length-at-age data available See also [3], App. B, section 2.1.1.		[1] (Dahle, 2001) [2] (Kerns and Bonneau, 2002) [3] (Schmolke et al., 2019)
Seedling emergence; emergence after hibernation; emergence of new generation				NA
Dormancy duration (inactive life stages, e.g., hibernation, soil seed bank)				NA
1 Includes discrete “growth” rates for transition of immature life stages depicted in stage-based models (Caswell 2001)
2 Includes continuous growth rate for used for size-based functions

## Sheet: Table S2
Table S2. Population and spatial characteristics that should be targeted to inform a population model for ERA. Examples of the types of information that could be considered to provide general, realistic, or precise estimates are described in each column. NA = Not available or applicable.
Characteristic	General	Realistic	Precise	REF	NOTES
Density dependence	Assumed density dependence of egg and larva survival (see [1], App. B, section 2.3.)			[1] (Schmolke et al., 2019)
Population size	NA or relative abundance	Population sizes in individual habitats (oxbows, streams) estimated; total population size (entire species) not available		(Dahle, 2001) – 0.3ha (Schmolke et al)
Spatial Metapopulation structure				NA
Movement				NA
Habitat features		Habitat suitability analysis available, mainly focused on oxbow habitat		See file “ts habitat review 2019-01-21.docx”
Geographical range	County-level distribution (Iowa, Kansas, Missouri, Montana, Nebraska, Minnesota, South Dakota)			FWS
Habitat classification/suitability				NA

## Sheet: Table S3
Table S3. External factors that should be targeted to inform a population model for ERA. Examples of the types of information that could be considered to provide general, realistic, or precise estimates are described in each column. NA = Not available or applicable.
Characteristic	General	Realistic	Precise	REF	NOTES
Predation/herbivory	[1] Predation by largemouth bass suggested, no quantitative data	2] [3] [4] Information on diet available (stomach content analysis) See also [5] App. B, section 2.6.		[1] (Campbell et al., 2016) [2] (Hatch and Besaw, 2017) [3] (Kerns and Bonneau, 2002) [4] (Dahle, 2001) [5] (Schmolke et al., 2019)
Competition	Egg cannibalism suggested, no quantitative data			[1] (Campbell et al., 2016) [2] (Hatch and Besaw, 2017) [3] (Kerns and Bonneau, 2002) [4] (Dahle, 2001)
Environmental conditions		Temperature-dependence of growth; maximum temperature of survival		Koehle, 2006 See also file “TS_temperature_fitting_Koehle.docx”
Stressors - pathogens				NA
Stressors – abiotic, other	Habitat loss, etc., see species recovery plan
Existing management		Oxbow restoration in Iowa
Indirect effects (obligatory relationships)		Topeka shiner lays eggs in nests of sunfish, no brood care by TS		(Campbell et al., 2016; Kerns and Bonneau, 2002)

## Sheet: Table S4
Table S4. Exposure and effects characteristics that should be targeted to inform a population model for ERA. Examples of the types of information that could be considered to provide general, realistic, or precise estimates are described in each column. NA = Not available or applicable.
inderect effects - data on diet items	direct effects - data on fish when exposed to chlorothalonil
Characteristic	General	Realistic	Precise
Chemical exposure	Estimated EEC1	Modeled fate and daily EECs based on environmental conditions	Modeled and measured concurrence of spatial and/or temporal pattern of exposure
Temporal exposure pattern	NA	Representative values of seasonal effects	High resolution (e.g., daily) modeling of chemical concentration and effect
Exposure pattern within and across habitat	NA	Estimate of proportion of population impacted by exposure based on spatial overlap. Estimated or hypothesized concentration distribution	Spatial distribution of chemical concentration/ gradient
Representation of toxic effects	Threshold of effect	Modeled or hypothesized dose-response function	Measured dose-response functions. Estimation of effect via e.g. TKTD models
Effects by life stage or size	Simulated impact based on assumptions or general trends (i.e., Adverse Outcome Pathways)	Effect based on observations in representative species	Measured effects in focal species included in parameter estimates
Effects depending on exposure route (e.g. dietary, chemical in water)	NA	Modeled or simulated internal dose value, effects based on categorical data (e.g., diet, exposure route)	Effects linked to body burden measurements
1 Expected Exposure Concentration
